# Supplementary material
Source: PubMed Central journal article supplement (PMC5137803)
Supplement: NIHMS824958-supplement-1.pdf [file NIHMS824958-supplement-1.pdf]

## Supplemental FIGURE 1

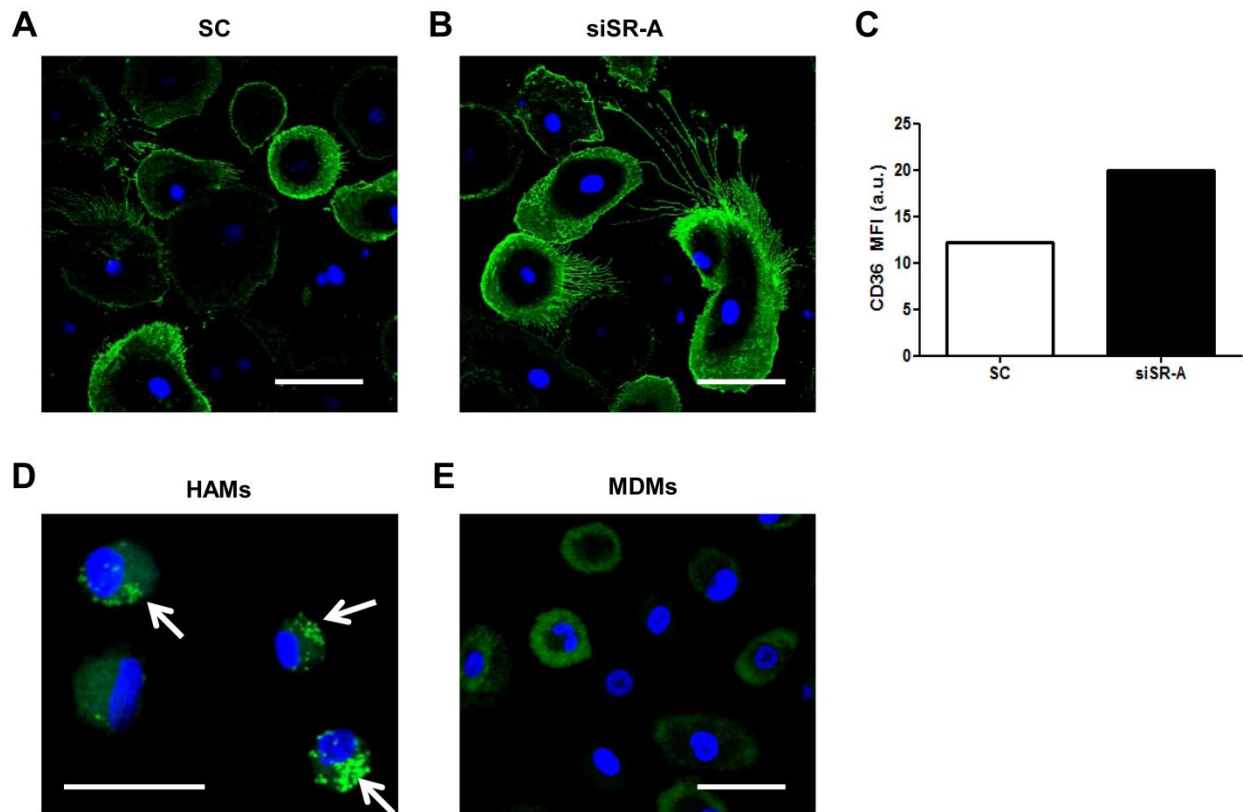

**SUPPLEMENTAL FIGURE 1. Increased CD36 expression in siSR-A MDMs and lipid body staining in HAMs and MDMs.** Day 6 MDMs on coverslips were exposed to scramble control (SC) (A) or anti SR-A siRNA (B) via MirusX2. Monolayers were fixed with 4% PFA, permeabilized with methanol and labeled with anti-CD36 Ab. Scale bars, 50 μm. (C) CD36 MFI in SC and siSR-A MDMs. Freshly isolated HAMs (D) or day 6 MDMs (E) were plated on coverslips, fixed with 4% PFA and exposed to 2.5 μg/ml Bodipy for 30 min in the dark at RT. Intracellular lipid content was analyzed by confocal microscopy. Although MDMs contain intracellular lipids, tissue-specific lipid bodies can be seen in the HAMs (arrows). Scale bars, 50 μm. Representative images from 1 (A-D) or 4 (E) independent experiments conducted in duplicate (mean ± SEM).

## Supplemental FIGURE 2

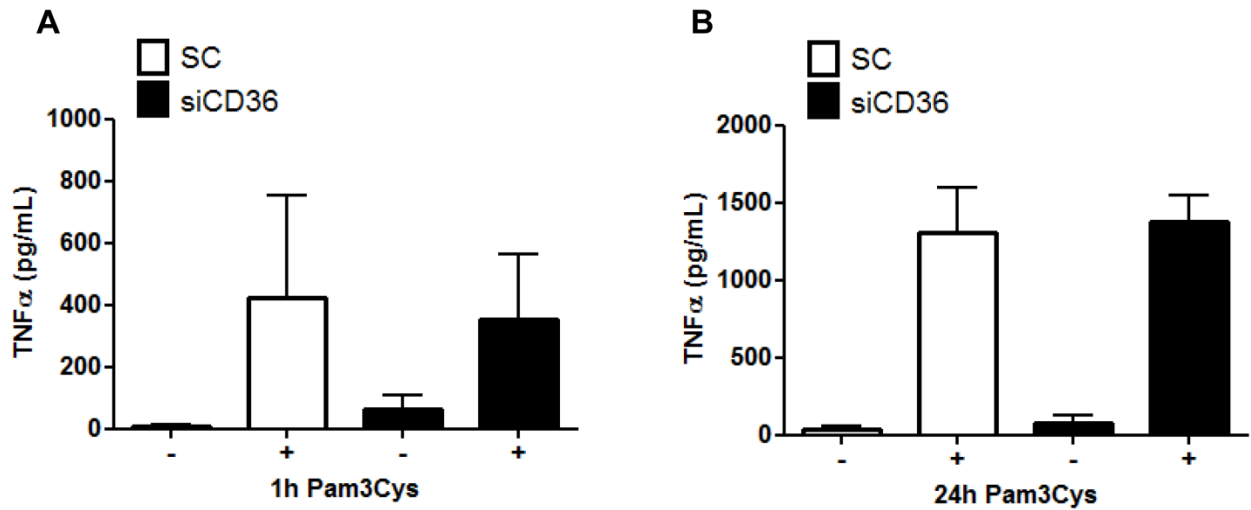

**SUPPLEMENTAL FIGURE 2. CD36 knockdown does not affect TLR2-dependent TNF $\alpha$  production.** MDMs were transfected with scramble control (SC) or anti-CD36 siRNA via MirusX2 per the manufacturer's protocol. MDMs were then exposed to Pam3Cys (100  $\mu$ g/mL) for 1h (**A**) or 24h (**B**). Cell free supernatants were collected and analyzed for TNF $\alpha$  production by ELISA. Shown are cumulative data from three independent experiments conducted in triplicate (mean  $\pm$  SEM).
